# Supplementary material for: Warmth and competence predict overoptimistic beliefs for out-group but not in-group members
Source: PLoS One. 2018 Nov 26;13(11):e0207670. doi: 10.1371/journal.pone.0207670 (PMC6261057; doi:10.1371/journal.pone.0207670)
Supplement: S1 Data File — (XLSX) [file pone.0207670.s014.xlsx]

## Sheet: Event designation
Original scenario	English translation	Designated desirability	Designated frequency	Designated Controllability
Ein Freund gibt zuvor geliehenes Geld zurück	A friend returns borrowed money to you	high	high	high
Ein heisses Bad/Dusche nehmen, an einem kalten Tag	Enjoy a warm bath or shower on a cold day	high	high	high
Umarmt werden	Being hugged	high	high	high
Verwandte haben, die einen bei einem Familienfest freundlich begrüssen	Being greeted warmly by relatives at a family celebration	high	high	high
Ein neuer Nachbar kommt sich vorstellen	A new neighbour comes to introduce themselves	high	high	low
Ein Song den man besonders gern hat, im Radio hören	A song that you like comes on the radio	high	high	low
Einen alten Freund zufällig auf der Strasse treffen	Bumping into an old friend on the street	high	high	low
Einen lustigen Witz hören	Hearing a very funny joke	high	high	low
2 Stunden ein Kind hüten und das Kind hat dabei Spass	A child has fun while you take care of him for 2 hours	high	low	high
Einen Beststeller über das eigene Leben schreiben	Writing a bestseller book about one's life	high	low	high
Einen Karaoke Contest gewinnen	Win a karaoke contest	high	low	high
Erfolgreich eine Rede halten	Giving a successful speech	high	low	high
20 CHF auf der Strasse finden	Find 20 CHF on the street	high	low	low
Beim Sportwetten gewinnen	Win a Sports bet	high	low	low
Ein Auto gewinnen	Win a car in a contest	high	low	low
Eine Sternschnuppe sehen	Seeing a comet in the sky	high	low	low
Eine öffentliche Toilette benutzen	Having to use an unsanitary public bathroom	low	high	high
Gammliges Essen im Kühlschrank finden	Finding rotten food in the fridge	low	high	high
Geschäft schliesst gerade, wenn man ankommt	Shop closes just as you arrive	low	high	high
Kalten Kaffee/Tee trinken	Having to drink cold coffee or tea	low	high	high
Ein Nachbar hört zu laut Musik	A neighbour is listening to very loud music	low	high	low
Gebrochenes Herz nach Beziehungsende haben	Getting heartbroken after a relationship	low	high	low
Von jemandem mit einer anderen Person verwechselt werden	Being confused with another person	low	high	low
Computer stürzt beim Schreiben eines Textes ab	Computer crashes in the middle of writing a text	low	high	low
50 CHF auf der Strasse verlieren	Lose 50 CHF on the street	low	low	high
Ehe endet in einer bitteren Scheidung	Marriage ends in bitter divorce	low	low	high
Sich eine Verwundung zuziehen, die genäht werden muss	Getting a knife wound that needs sewing	low	low	high
Starke, kaum aushaltbare Zahnschmerzen bekommen	Having an excruciating toothache	low	low	high
Bei einem starken Sturm beobachten, wie ein Baum auf ein Haus fällt	Witness how a tree falls on a house during a strong storm	low	low	low
Fälschlicherweise für ein ernstes Verbrechen beschuldigt werden	Falsely being accused of a serious crime	low	low	low
Von einem Hund gebissen werden	Being bitten by a dog	low	low	low
Zeuge des Ausraubens einer Bankfiliale werden	Witnessing an ongoing bank robbery	low	low	low

## Sheet: RAW Scores
Participant	Gender	Likelihood estimate SELF-2 Stunden ein Kind hüten und das Kind hat dabei Spass	Likelihood estimate SELF-20 CHF auf der Strasse finden	Likelihood estimate SELF-50 CHF auf der Strasse verlieren	Likelihood estimate SELF-Bei einem starken Sturm beobachten, wie ein Baum auf ein Haus fällt	Likelihood estimate SELF-Beim Sportwetten gewinnen	Likelihood estimate SELF-Computer stürzt beim Schreiben eines Textes ab	Likelihood estimate SELF-Ehe endet in einer bitteren Scheidung	Likelihood estimate SELF-Ein Auto gewinnen	Likelihood estimate SELF-Ein Freund gibt zuvor geliehenes Geld zurück	Likelihood estimate SELF-Ein heisses Bad/Dusche nehmen, an einem kalten Tag	Likelihood estimate SELF-Ein Nachbar hört zu laut Musik	Likelihood estimate SELF-Ein neuer Nachbar kommt sich vorstellen	Likelihood estimate SELF-Ein Song den man besonders gern hat, im Radio hören	Likelihood estimate SELF-Eine öffentliche Toilette benutzen	Likelihood estimate SELF-Eine Sternschnuppe sehen	Likelihood estimate SELF-Einen alten Freund zufällig auf der Strasse treffen	Likelihood estimate SELF-Einen Beststeller über das eigene Leben schreiben	Likelihood estimate SELF-Einen Karaoke Contest gewinnen	Likelihood estimate SELF-Einen lustigen Witz hören	Likelihood estimate SELF-Erfolgreich eine Rede halten	Likelihood estimate SELF-Fälschlicherweise für ein ernstes Verbrechen beschuldigt werden	Likelihood estimate SELF-Gammliges Essen im Kühlschrank finden	Likelihood estimate SELF-Gebrochenes Herz nach Beziehungsende haben	Likelihood estimate SELF-Geschäft schliesst gerade, wenn man ankommt	Likelihood estimate SELF-Kalten Kaffee/Tee trinken	Likelihood estimate SELF-Sich eine Verwundung zuziehen, die genäht werden muss	Likelihood estimate SELF-Starke, kaum aushaltbare Zahnschmerzen bekommen	Likelihood estimate SELF-Umarmt werden	Likelihood estimate SELF-Verwandte haben, die einen bei einem Familienfest freundlich begrüssen	Likelihood estimate SELF-Von einem Hund gebissen werden	Likelihood estimate SELF-Von jemandem mit einer anderen Person verwechselt werden	Likelihood estimate SELF-Zeuge des Ausraubens einer Bankfiliale werden	Likelihood estimate-2 Stunden ein Kind hüten und das Kind hat dabei Spass-Alcoholic	Likelihood estimate-2 Stunden ein Kind hüten und das Kind hat dabei Spass-Business	Likelihood estimate-2 Stunden ein Kind hüten und das Kind hat dabei Spass-Elderly	Likelihood estimate-2 Stunden ein Kind hüten und das Kind hat dabei Spass-Student	Likelihood estimate-20 CHF auf der Strasse finden-Alcoholic	Likelihood estimate-20 CHF auf der Strasse finden-Business	Likelihood estimate-20 CHF auf der Strasse finden-Elderly	Likelihood estimate-20 CHF auf der Strasse finden-Student	Likelihood estimate-50 CHF auf der Strasse verlieren-Alcoholic	Likelihood estimate-50 CHF auf der Strasse verlieren-Business	Likelihood estimate-50 CHF auf der Strasse verlieren-Elderly	Likelihood estimate-50 CHF auf der Strasse verlieren-Student	Likelihood estimate-Bei einem starken Sturm beobachten, wie ein Baum auf ein Haus fällt-Alcoholic	Likelihood estimate-Bei einem starken Sturm beobachten, wie ein Baum auf ein Haus fällt-Business	Likelihood estimate-Bei einem starken Sturm beobachten, wie ein Baum auf ein Haus fällt-Elderly	Likelihood estimate-Bei einem starken Sturm beobachten, wie ein Baum auf ein Haus fällt-Student
SCM01	Male	85	35	22	27	71	15	73	38	79	85	7	10	78	93	4	88	11	37	87	35	27	85	92	73	74	19	27	87	14	68	40	22	73	3	90	64	0	27	59	62	7	0	81	11	51	28	92	34
SCM02	Female	91	10	33	18	0	79	71	3	7	72	30	50	76	53	50	7	6	0	62	18	16	50	80	23	17	50	17	54	31	7	34	11	5	12	88	76	23	33	12	13	16	9	28	19	60	20	50	43
SCM03	Female	76	79	24	56	0	87	10	36	89	100	89	100	100	77	79	100	8	81	100	82	5	88	100	86	100	24	66	100	100	4	89	43	18	0	100	100	43	57	72	90	88	22	83	44	55	25	83	73
SCM05	Female	89	48	19	29	13	65	31	17	75	57	31	44	75	52	78	62	16	53	53	65	23	28	72	52	82	53	50	85	69	12	53	7	44	56	71	89	53	50	53	52	46	47	47	50	35	46	40	39
SCM06	Female	94	91	65	94	0	95	21	66	92	100	29	78	100	89	100	87	84	58	92	92	8	8	37	77	54	12	50	100	98	10	59	70	0	17	98	100	96	12	95	69	100	82	90	92	13	36	84	91
SCM07	Female	100	53	7	77	0	53	21	2	64	64	4	18	85	81	80	62	53	0	86	64	2	10	22	57	0	79	7	95	88	24	14	7	37	44	91	98	55	13	10	59	0	6	71	35	0	8	57	64
SCM08	Male	79	50	18	50	58	66	51	50	100	100	39	59	24	100	60	80	42	73	79	92	50	39	100	55	85	35	35	100	100	50	81	50	24	25	100	100	78	23	64	58	80	20	65	25	60	39	72	74
SCM09	Female	34	43	18	50	1	76	18	7	100	100	45	82	100	100	100	100	0	18	100	1	1	100	100	100	100	21	94	100	100	45	39	1	45	66	94	100	96	100	100	100	68	69	93	100	100	100	91	100
SCM10	Male	93	34	4	57	8	62	21	10	77	100	77	61	100	31	80	83	55	0	91	93	7	35	95	54	59	41	47	100	88	62	57	37	32	39	88	88	70	38	53	60	0	62	56	54	72	0	61	47
SCM11	Female	100	1	11	2	0	45	33	0	100	100	100	61	100	100	34	100	0	3	100	68	4	100	100	100	100	77	30	100	100	10	100	2	66	27	100	72	21	1	27	0	42	70	38	50	2	3	8	1
SCM12	Female	68	6	7	22	0	88	3	4	47	95	22	60	100	84	38	91	0	0	91	46	0	29	68	43	78	40	4	92	67	38	71	1	11	23	90	80	82	0	26	57	31	8	62	39	44	10	67	43
SCM13	Female	100	78	79	80	60	100	25	57	100	100	29	100	100	89	96	100	17	54	100	44	77	59	100	100	67	100	73	100	100	70	12	100	4	42	100	100	37	70	55	60	86	51	39	100	64	68	97	100
SCM14	Female	19	50	23	50	0	79	29	50	50	51	0	50	50	50	50	50	1	0	50	50	34	70	50	50	50	52	50	50	96	50	50	50	50	50	72	50	50	50	50	50	50	50	50	50	50	50	50	50
SCM15	Female	90	44	22	29	0	56	58	24	75	85	76	40	98	85	48	60	35	71	72	50	22	60	100	62	62	31	65	100	65	19	38	24	28	37	73	95	78	28	22	63	67	12	37	38	50	42	65	51
SCM16	Female	61	46	38	58	4	61	50	28	61	73	38	69	68	69	65	63	34	26	63	50	31	60	56	54	50	38	39	92	64	40	59	39	38	38	61	74	40	38	35	62	35	42	36	56	51	40	66	66
SCM17	Female	100	30	37	80	11	57	0	4	99	100	80	89	100	100	11	95	55	0	98	95	2	28	100	83	7	80	64	100	100	52	43	68	24	29	100	100	40	10	57	53	90	71	36	33	35	72	80	72
SCM18	Female	97	12	6	29	0	80	3	4	58	88	20	35	61	36	88	86	2	4	96	59	2	75	63	61	16	32	4	86	97	3	14	23	42	36	97	92	28	55	56	55	35	57	32	30	42	7	3	31
SCM19	Female	42	64	20	58	67	81	0	57	82	100	40	83	83	61	100	82	8	21	94	0	53	46	100	100	56	60	43	87	100	84	100	64	0	8	100	89	100	79	72	93	47	35	69	85	86	56	78	81
SCM20	Female	82	57	43	82	28	92	12	53	78	90	53	76	97	58	65	80	16	44	64	68	8	75	75	65	68	88	68	95	100	36	83	40	28	9	76	95	70	29	20	89	24	80	85	83	53	66	30	88
SCM21	Female	73	61	33	18	0	73	17	28	72	75	30	9	68	95	89	87	9	3	80	80	21	67	44	71	100	61	68	92	91	53	64	16	14	17	94	100	65	38	46	79	53	82	24	0	76	25	54	53
SCM22	Female	88	6	6	7	0	84	0	50	100	86	67	50	93	92	50	62	1	85	50	72	0	8	90	13	81	8	15	86	90	5	17	0	50	49	50	78	50	41	50	50	35	12	50	35	11	50	50	9
SCM23	Male	100	63	0	9	100	20	5	56	28	100	9	77	100	50	100	96	92	4	100	92	4	7	100	95	100	50	50	100	86	4	78	4	8	32	77	100	76	27	19	76	10	8	12	78	10	6	17	23
SCM24	Female	11	7	36	2	5	71	50	3	71	93	67	71	98	95	32	65	2	12	77	50	2	47	83	47	67	32	35	96	92	11	66	2	20	20	88	67	55	40	20	14	35	23	35	56	45	31	16	64
SCM25	Female	76	54	19	40	62	100	29	41	65	100	23	58	98	62	71	85	29	6	83	54	16	12	90	71	40	58	76	87	89	23	30	33	16	36	81	100	61	7	54	54	18	68	21	54	30	23	73	67
SCM26	Female	85	56	42	77	3	85	20	55	90	94	54	92	76	97	95	89	54	57	74	95	33	90	91	93	100	78	85	83	98	36	63	47	81	75	75	87	80	59	38	87	82	45	11	96	64	42	60	92
SCM27	Female	75	0	0	0	50	34	50	0	89	89	37	61	97	50	20	51	0	27	81	53	16	38	100	4	69	10	19	100	92	3	31	9	50	57	64	76	1	0	4	0	8	6	4	6	5	15	13	45
SCM28	Female	61	59	66	43	52	82	36	41	74	97	73	44	94	52	60	75	39	16	63	50	47	42	66	95	36	54	33	79	63	100	80	52	30	39	76	81	42	50	61	54	77	37	50	76	22	36	81	50
SCM29	Male	7	11	2	2	60	58	85	4	94	90	68	25	15	60	70	76	2	2	59	50	2	79	95	34	43	12	12	76	93	4	7	2	10	8	82	67	25	64	76	25	50	2	90	16	8	8	8	9
SCM30	Female	87	50	34	50	17	51	0	19	98	95	77	50	87	100	80	77	8	15	99	35	17	97	83	68	89	50	72	100	100	63	50	21	15	30	97	97	81	50	57	93	14	86	87	88	50	50	96	50
SCM31	Male	100	100	0	20	70	59	1	96	100	100	64	100	100	18	100	100	78	100	100	100	5	0	84	0	25	33	0	100	100	0	63	15	0	0	100	82	0	90	100	100	75	15	0	4	82	25	86	25
SCM32	Female	80	63	12	39	19	89	16	33	60	77	82	40	94	100	34	88	18	87	87	15	9	82	95	57	37	83	70	90	81	63	73	65	61	6	94	80	91	0	28	90	0	64	13	55	66	22	61	40
SCM33	Female	63	18	2	23	0	83	2	11	86	95	20	10	96	99	20	75	13	2	92	65	10	71	81	2	1	58	17	99	100	16	66	12	1	62	96	86	27	15	22	21	74	3	33	26	80	19	84	22
SCM34	Female	57	58	36	39	26	66	20	28	68	66	20	68	69	58	76	75	61	68	44	21	38	80	90	67	66	42	36	92	76	34	77	35	28	25	79	65	72	65	58	60	60	36	71	30	41	35	42	39
SCM35	Female	97	25	43	25	6	93	17	2	81	91	19	76	20	95	54	94	3	8	89	62	36	20	93	72	100	43	28	99	50	22	100	18	39	36	100	100	79	15	83	67	35	69	81	38	16	75	68	62
SCM36	Female	38	60	81	39	39	60	58	46	57	91	53	45	96	98	93	90	70	54	64	68	53	66	100	60	47	76	68	91	30	38	60	43	40	33	83	73	35	46	44	63	42	46	50	80	40	47	66	58
SCM38	Female	99	67	11	35	2	65	60	1	80	87	33	44	99	65	71	84	18	22	99	77	50	92	99	45	83	86	57	100	100	61	100	50	50	50	100	100	70	69	81	77	55	21	5	66	39	66	85	78
SCM39	Female	94	13	47	9	5	41	0	12	86	100	36	5	100	100	3	95	5	80	88	75	2	76	57	50	9	24	22	100	100	16	72	3	16	57	73	88	34	77	50	50	29	96	82	30	97	93	60	68
SCM40	Female	18	19	6	9	0	75	9	24	100	80	95	63	96	16	13	72	4	68	60	32	11	70	100	12	64	20	60	84	100	23	25	50	10	54	88	90	17	55	53	44	13	85	43	64	53	24	54	24
SCM41	Female	100	11	4	90	9	8	7	50	87	100	9	90	100	23	87	92	6	7	86	74	11	15	92	9	24	8	86	100	100	50	50	8	0	14	68	86	19	0	27	92	79	76	37	7	6	6	92	61
SCM42	Female	65	38	59	16	5	53	50	9	81	99	74	64	91	50	13	80	43	5	89	56	19	84	65	55	66	53	32	63	80	6	64	14	60	80	80	72	52	47	54	45	44	37	52	70	18	27	43	33
SCM43	Female	68	14	16	5	0	92	6	5	80	72	24	59	40	100	46	96	14	0	71	92	17	90	58	78	81	3	93	92	63	54	65	6	23	20	93	89	71	29	9	89	3	43	38	32	8	11	40	78
SCMC01	Female	73	60	62	36	37	68	29	67	62	76	64	47	82	42	75	79	60	33	53	54	41	63	60	59	63	58	40	95	80	22	58	33	32	24	85	80	58	36	43	76	67	42	67	64	35	69	63	48
SCMC02	Female	62	44	58	56	50	68	25	22	62	73	57	67	90	86	82	83	57	38	77	61	35	50	45	75	67	76	64	88	85	60	63	5	36	67	84	74	49	61	50	50	60	64	24	63	75	74	75	68
SCMC03	Female	76	70	43	50	65	79	13	50	68	88	37	78	81	0	50	11	63	27	89	81	18	29	96	63	41	50	74	97	90	50	64	51	0	61	62	100	76	50	68	79	0	44	73	75	50	50	50	50
SCMC04	Female	89	50	60	16	0	76	19	0	92	100	64	15	67	40	50	56	0	0	100	26	50	38	93	50	73	43	66	100	100	50	89	50	0	0	71	88	56	38	43	52	50	22	0	50	50	3	42	50
SCMC05	Female	96	50	97	50	24	50	10	2	49	94	13	16	94	96	50	77	14	0	75	50	50	50	75	93	24	15	69	87	99	22	50	10	88	76	91	93	75	50	50	76	77	75	78	90	77	74	76	74
SCMC06	Female	33	5	51	7	4	65	0	8	38	100	10	21	64	97	12	86	50	19	48	44	8	75	100	56	45	55	54	96	64	51	53	7	6	43	66	69	7	26	25	19	85	50	53	62	39	48	42	52
SCMC07	Female	100	32	41	11	5	42	7	3	81	90	19	92	100	99	87	89	6	4	90	25	11	90	100	77	35	68	68	100	100	18	84	5	3	5	88	98	12	21	44	84	62	25	87	45	12	26	72	37
SCMC08	Female	55	50	34	44	0	75	43	4	70	0	64	68	75	77	56	64	28	7	55	62	21	16	65	15	4	47	39	79	85	37	0	10	29	44	56	64	40	50	51	50	31	12	9	41	5	52	68	45
SCMC09	Female	91	31	20	6	8	75	8	18	76	80	34	65	93	91	11	78	20	63	62	57	34	79	89	58	85	63	58	88	89	31	97	24	87	54	63	82	16	36	35	43	44	29	37	54	32	8	38	18
SCMC10	Female	72	57	10	50	0	91	87	28	83	63	14	74	86	91	50	88	50	50	93	32	79	55	93	43	89	90	36	97	100	50	69	50	38	43	90	87	59	29	59	80	65	79	26	23	29	42	95	58
SCMC11	Male	85	44	29	37	19	74	28	20	68	76	30	44	80	87	75	78	24	45	90	36	20	36	72	59	24	75	37	94	92	13	56	10	58	42	83	80	76	28	34	60	25	50	24	56	58	23	73	34
SCMC12	Female	82	66	39	56	41	53	31	47	79	72	65	63	70	82	39	63	56	63	67	77	18	72	63	55	65	73	30	85	83	62	77	28	44	18	90	75	44	36	27	72	30	65	74	65	36	32	58	60
SCMC13	Female	69	11	11	16	3	54	39	15	89	95	43	69	97	87	10	93	4	0	67	33	9	53	97	35	6	50	18	99	91	5	19	7	51	18	93	50	28	44	50	50	39	54	46	19	23	24	24	13
SCMC14	Female	91	97	63	95	31	90	30	29	73	94	19	91	74	65	76	91	10	34	100	50	8	36	99	71	27	79	100	95	98	35	100	94	41	35	89	92	98	57	100	98	71	83	98	96	67	75	95	94
SCMC15	Female	87	59	37	23	12	83	32	17	96	89	21	74	92	97	89	85	12	34	93	64	50	8	65	67	35	81	44	90	100	50	76	28	65	75	100	91	56	69	37	67	39	54	70	58	82	64	8	50
SCMC16	Female	94	60	19	36	47	93	44	25	67	23	25	41	77	91	56	91	17	26	68	66	55	33	72	53	95	100	32	92	95	22	95	35	41	44	93	92	38	21	32	55	12	60	15	44	60	36	60	65
SCMC17	Female	64	50	50	50	0	94	50	44	77	90	0	75	78	100	50	50	1	0	67	56	26	41	49	26	100	65	51	100	91	50	34	50	7	37	79	56	43	51	50	50	56	50	50	50	50	50	50	50
SCMC18	Female	49	79	36	11	38	68	13	7	63	100	6	50	100	99	35	100	8	0	81	36	0	8	50	90	15	21	91	100	100	42	74	30	26	5	95	100	73	38	84	86	15	28	100	50	45	26	42	23
SCMC19	Female	83	47	58	38	16	71	36	28	64	93	8	67	75	69	45	84	50	56	78	67	35	32	55	58	56	73	40	98	88	40	66	31	63	38	82	60	50	56	39	70	68	47	57	59	73	20	44	43
SCMC20	Female	84	60	7	19	1	6	0	0	75	84	0	55	96	30	53	72	61	87	55	64	10	75	84	99	34	26	20	96	90	10	63	1	22	31	100	100	28	41	32	78	18	41	37	27	34	36	58	81
SCMC21	Female	79	50	28	50	36	81	7	50	75	81	35	34	93	67	74	92	11	50	76	27	50	83	67	61	63	50	50	90	77	57	50	51	74	34	91	88	50	50	50	50	78	11	80	16	50	81	50	50
SCMC22	Female	91	17	10	64	1	63	24	6	97	99	37	29	89	94	50	88	2	7	98	22	7	64	97	40	62	46	33	99	97	19	55	8	35	38	78	91	50	31	90	50	72	42	62	33	46	50	56	47
SCMC23	Female	92	50	3	50	5	84	1	0	87	64	100	0	93	81	75	50	13	91	37	83	3	96	100	8	63	7	50	76	100	50	66	50	78	11	83	97	50	50	50	50	50	32	50	14	50	50	50	50
SCMC24	Female	91	9	3	11	6	29	50	3	82	96	60	71	94	70	16	96	26	0	100	83	9	10	67	25	8	13	31	100	100	10	100	2	39	64	91	59	62	29	21	42	24	45	25	26	13	10	32	23
SCMC25	Female	36	11	17	50	0	27	50	9	81	50	73	22	65	50	23	23	0	0	74	12	30	29	6	7	97	64	10	50	67	42	36	50	55	27	70	63	50	39	33	63	64	38	63	50	50	53	50	41
SCMC26	Female	90	27	5	5	3	97	64	2	93	90	57	90	96	100	65	94	6	3	93	13	2	69	98	95	96	94	76	96	96	1	86	4	2	5	82	100	64	18	52	74	79	4	15	5	10	1	9	30
SCMC27	Female	62	63	29	12	0	44	50	10	61	90	36	64	16	91	69	90	0	0	93	71	2	64	100	54	15	11	45	89	93	38	64	10	2	34	90	94	84	43	91	92	100	7	72	33	59	42	78	63
SCMC28	Female	100	55	22	29	60	50	50	95	83	95	59	90	100	86	58	83	50	0	78	57	2	51	77	54	1	30	22	100	96	14	90	22	15	42	63	100	57	14	57	71	66	40	70	38	50	50	58	62
SCMC29	Female	74	83	60	32	27	96	33	91	62	100	95	83	61	33	78	92	30	63	75	55	22	21	31	23	6	29	19	71	100	19	31	39	9	10	100	90	20	26	82	74	24	69	73	21	9	4	70	65
SCMC30	Female	50	8	30	0	5	35	27	1	71	68	2	64	50	50	50	32	21	50	50	50	10	41	61	50	50	34	9	50	71	3	34	3	44	50	65	50	6	1	4	6	62	64	68	6	0	1	0	0
SCMS01	Female	77	25	63	2	0	12	89	0	26	49	0	26	80	99	61	57	77	0	50	59	3	91	100	97	96	3	10	86	97	63	59	1	6	9	69	91	73	4	53	50	98	4	84	92	59	2	85	28
SCMS02	Female	64	36	25	22	0	50	50	0	75	90	34	58	9	42	90	56	8	2	59	54	29	42	77	55	76	27	38	91	93	45	51	4	12	57	74	71	42	32	62	31	46	75	19	40	58	29	63	34
SCMS03	Female	84	15	60	38	2	79	5	23	75	94	0	67	98	99	64	94	66	39	80	87	6	65	96	56	90	62	57	92	91	41	79	13	33	38	78	91	38	41	36	50	69	22	32	56	31	32	29	34
SCMS04	Female	65	62	16	27	12	88	22	23	90	68	85	40	98	90	35	91	79	9	87	45	29	64	67	87	56	16	36	95	90	72	45	59	64	18	90	83	89	11	34	88	58	6	64	35	40	23	64	69
SCMS05	Female	72	44	42	50	23	50	31	20	58	84	40	64	28	77	50	50	44	45	63	57	18	63	46	55	54	54	27	69	77	55	57	36	42	47	72	58	50	50	50	50	73	49	55	50	50	50	50	50
SCMS06	Female	76	50	57	50	44	60	45	50	85	70	42	55	81	62	50	84	43	38	78	68	44	57	93	48	77	56	54	83	94	37	58	50	25	41	84	81	63	50	61	62	50	34	50	56	57	53	81	50
SCMS07	Female	24	23	4	13	0	35	8	5	94	100	72	28	83	80	39	70	2	82	76	71	6	7	90	13	0	12	32	90	73	70	68	31	65	21	100	65	50	34	17	23	10	60	38	40	36	21	18	18
SCMS08	Female	50	36	73	36	12	62	69	14	73	99	89	57	73	88	74	78	26	14	76	28	38	60	89	74	88	85	73	73	90	29	75	56	31	37	75	82	37	56	75	57	35	21	19	59	29	34	90	60
SCMS09	Female	74	50	34	43	44	71	39	36	38	84	34	65	69	76	78	74	42	62	74	58	38	46	75	68	62	69	28	92	85	28	61	25	74	27	61	68	50	49	56	43	18	42	63	37	68	29	64	76
SCMS10	Female	100	89	12	77	11	75	5	11	88	100	1	94	63	100	100	100	12	61	100	96	26	80	36	97	100	66	4	100	100	37	83	32	34	32	100	100	87	3	62	89	3	34	63	65	69	40	59	69
SCMS11	Female	99	73	26	50	0	79	50	50	69	87	43	76	100	50	50	91	34	62	73	50	0	72	71	85	72	39	50	100	100	28	69	26	34	21	73	100	71	23	66	69	29	7	75	50	86	100	100	100
SCMS12	Female	95	56	2	16	0	100	0	18	64	92	23	41	86	65	55	76	6	37	75	35	10	68	22	72	62	47	25	100	100	28	50	16	26	7	79	98	63	26	35	70	8	60	60	30	54	41	63	53
SCMS13	Female	97	9	49	0	0	23	43	0	99	100	24	5	99	100	83	96	6	50	96	66	0	77	94	98	51	74	91	100	100	2	3	0	18	67	79	92	8	50	11	2	19	21	6	72	1	1	1	1
SCMS14	Male	44	3	23	0	0	33	1	1	88	15	1	50	8	79	24	46	7	0	67	70	0	47	92	4	77	3	2	94	97	36	24	1	76	41	77	78	11	2	14	5	22	7	16	11	1	6	25	12
SCMS15	Female	100	64	27	93	35	93	9	20	94	98	9	98	100	100	74	100	33	66	95	91	16	35	94	67	91	36	37	100	100	25	83	21	26	33	100	100	77	11	57	98	77	20	77	26	21	26	95	89
SCMS16	Female	94	3	0	3	0	52	12	2	49	91	7	46	88	58	88	63	42	6	78	51	0	44	52	11	58	7	51	67	53	0	10	0	12	19	75	76	7	3	4	8	15	3	13	7	37	2	11	14
SCMS17	Female	10	13	11	27	4	74	0	9	50	70	6	11	42	73	66	32	15	23	29	55	25	67	6	39	32	4	19	23	74	36	53	28	26	35	63	76	46	23	50	30	29	21	19	37	69	63	20	23
SCMS18	Male	75	57	68	35	77	79	40	35	76	84	40	81	70	79	74	91	14	56	96	78	9	83	70	80	96	59	50	97	95	13	67	21	16	54	82	57	37	30	36	38	35	75	59	50	64	55	65	42
[truncated: 540 more columns]
